# Supplementary material for: Binder-free rice husk-based silicon–graphene composite as energy efficient Li-ion battery anodes
Source: Royal Society of Chemistry journal article supplement (doi:10.1039/c4ta00940a), 2014-01-01
Supplement: c4ta00940a1.pdf [file c4ta00940a1.pdf]

## Supplementary Information

### **Binder-free Rice husk-based Silicon-Graphene Composite Paper as Energy Efficient Li-ion Battery Anodes**

Deniz P. Wong<sup>a,b,c</sup>, Rangaraj Suriyaprabha<sup>d</sup>, Rathinam Yuvakumar<sup>d</sup>, Venkatachalam Rajendran<sup>d</sup>, Yit-Tsong Chen<sup>c,f</sup>, Bing-Joe Hwang<sup>e</sup>, Li-Chyong Chen<sup>a\*</sup> and Kuei-Hsien Chen<sup>\*</sup>

<sup>a</sup> Center for Condensed Matter Sciences, and Center for Emerging Material and Advanced Devices, National Taiwan University, Taipei 10617, Taiwan

<sup>b</sup> Nanoscience and Technology Program, Taiwan International Graduate Program, Academia Sinica, Taipei 11529, Taiwan

<sup>c</sup> Department of Chemistry, National Taiwan University, Taipei 10617, Taiwan

<sup>d</sup> Center for Nanoscience and Technology, K. S. Rangasamy College of Technology, Tiruchengode – 637 215, Tamil Nadu, India

<sup>e</sup> Department of Chemical Engineering, National Taiwan University of Science and Technology, 43 Keelung Road, Section 4, Taipei 10617, Taiwan

<sup>f</sup> Institute of Atomic and Molecular Sciences, Academia Sinica, Taipei 10617, Taiwan

Fax: +886- 2-336652xx; Tel: +886-2-33665231; E-mail: [chenlc@ntu.edu.tw](mailto:chenlc@ntu.edu.tw) (L.C. Chen) or [chenkh@pub.iams.sinica.edu.tw](mailto:chenkh@pub.iams.sinica.edu.tw) (K.H. Chen).

#### *Index Page*

|                                                                              |   |
|------------------------------------------------------------------------------|---|
| <b>Fig. S1.</b> Preparation of GO suspension                                 | 2 |
| <b>Fig. S2.</b> Cross-sectional SEM image of the Si-graphene composite paper | 3 |
| <b>Fig. S3.</b> XRD spectra of the rice husk-based Si NPs composite          | 4 |
| <b>Fig. S4.</b> Raman spectra of the rice husk-based Si NPs composite        | 5 |
| <b>Fig. S5.</b> EDS spectra of the rice husk-based Si NPs composite          | 6 |

## **S1. Preparation of GO suspension<sup>1</sup>**

GO was prepared using a modified Hummers and Offeman's method.<sup>2</sup> In a typical reaction, graphite (2.5 g, ITRI), sodium nitrate ( $\text{NaNO}_3$ , 2.5g, reagent grade, Aldrich) and sulfuric acid ( $\text{H}_2\text{SO}_4$ , 115 mL, Acros) were stirred together in an ice bath. Potassium permanganate ( $\text{KMnO}_4$ , 7.5g, Aldrich) was slowly added while stirring, and the rate of addition was controlled to prevent the mixture temperature from exceeding  $20^\circ\text{C}$ .

The mixture was then transferred to a  $35^\circ\text{C}$  water bath and stirred for about 0.5 hour, forming a thick paste. Subsequently, de-ionized water (115 mL) was added gradually, causing an increase in temperature to  $98^\circ\text{C}$ . After 15 min., the mixture was further treated with de-ionized water (350 mL) and  $\text{H}_2\text{O}_2$  solution (30%, 25 mL). The warm solution was then filtered and washed with de-ionized water until the pH was 7 and dried at  $65^\circ\text{C}$  under vacuum.

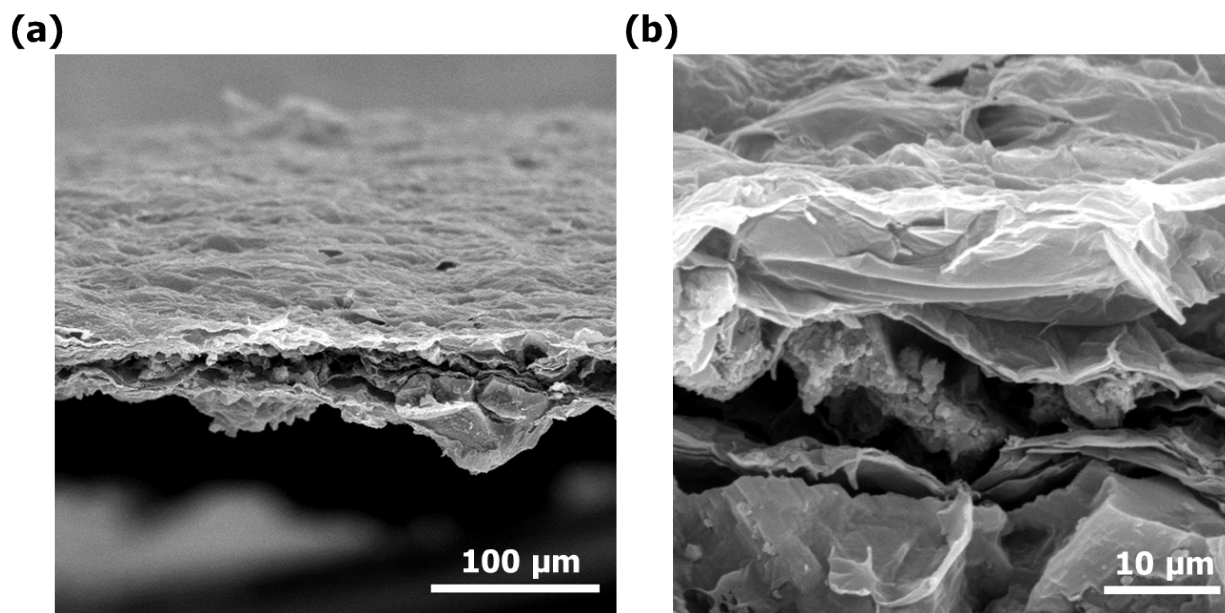

**Fig. S2.** Cross-sectional SEM image of the Si-graphene composite paper

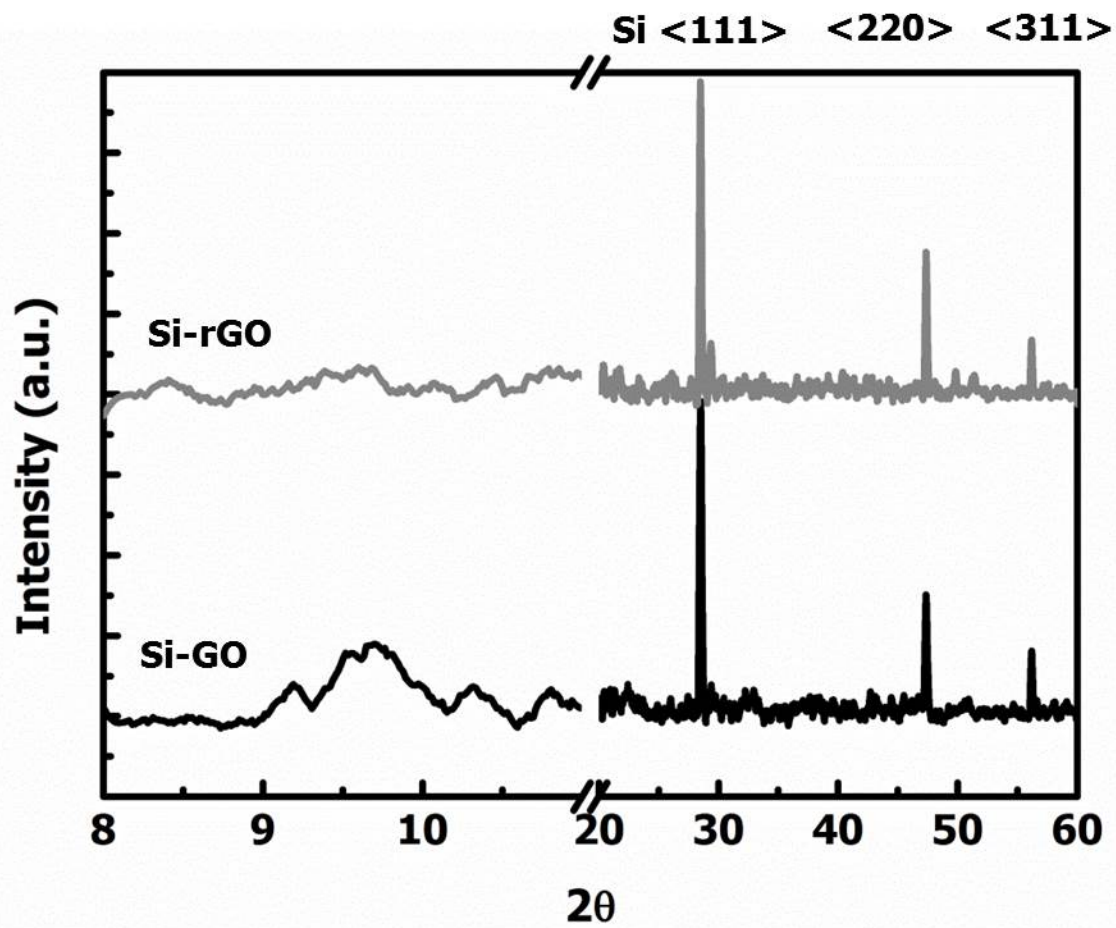

**Fig. S3.** XRD spectra of the rice husk-based Si NPs composite before (black) and after (gray) thermal reduction in Ar atmosphere

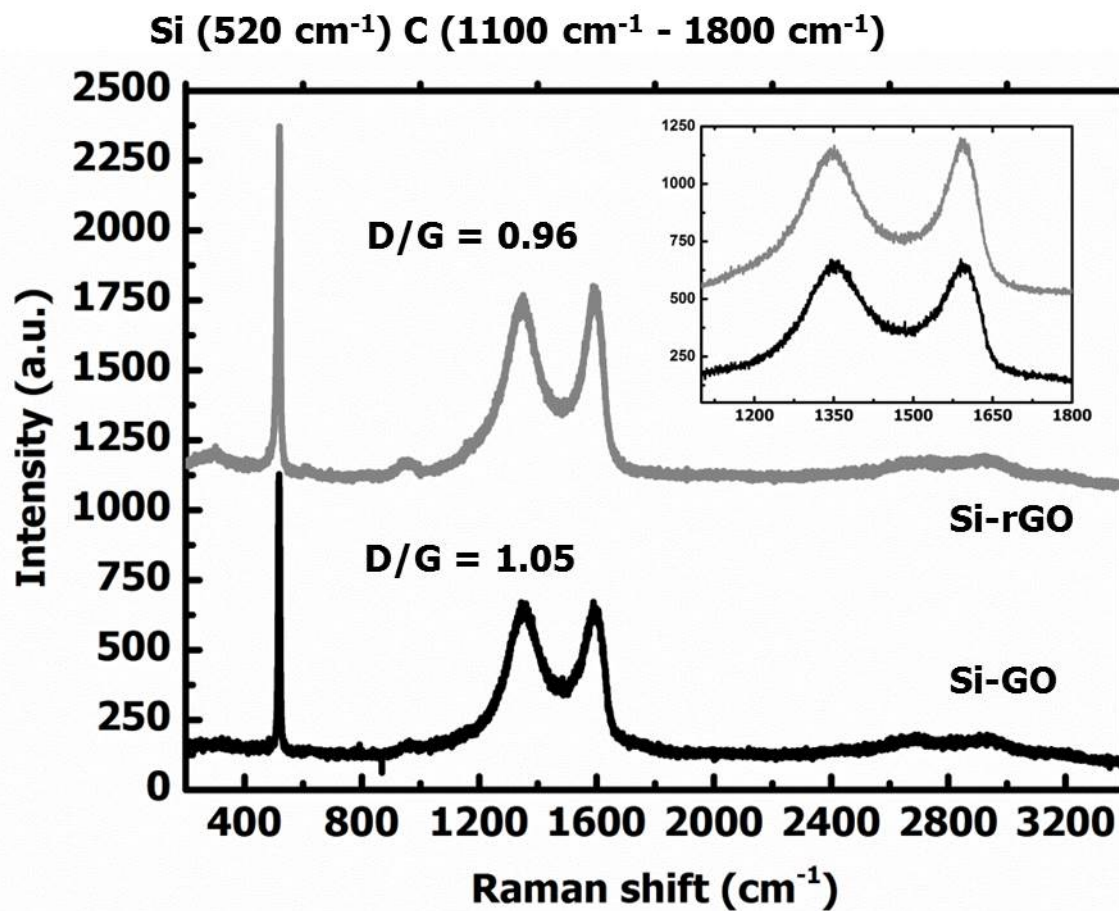

**Fig. S4.** Raman spectra of the rice husk-based Si NPs composite before (black) and after (gray) thermal reduction in Ar atmosphere.

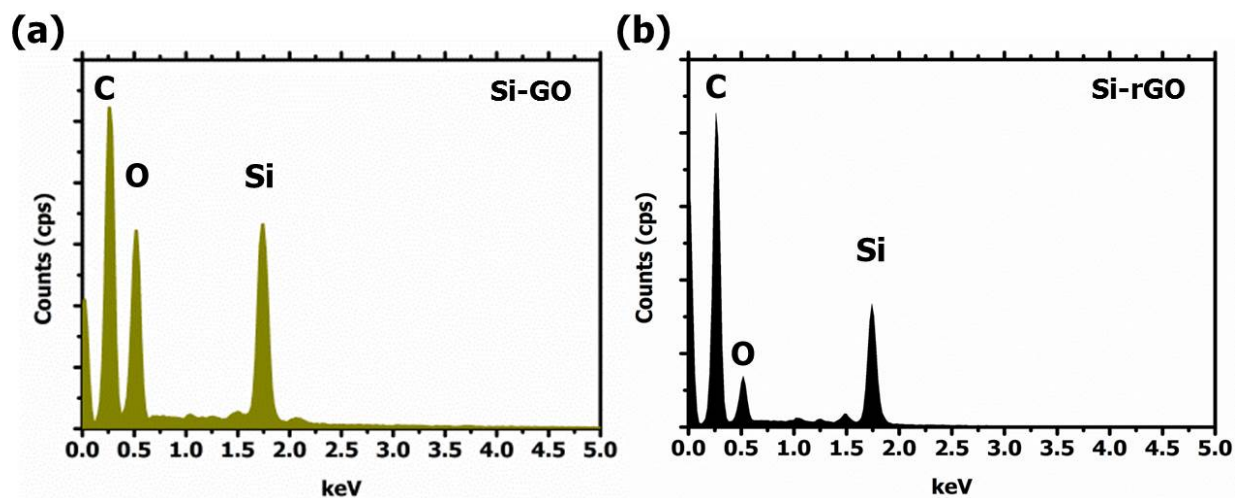

**Fig. S5.** SEM-EDS spectra of the rice husk-based Si NPs composite (a) before and (b) after thermal reduction in Ar atmosphere.

1. H.-C. Hsu, I. Shown, H.-Y. Wei, Y.-C. Chang, H.-Y. Du, Y.-G. Lin, C.-A. Tseng, C.-H. Wang, L.-C. Chen, Y.-C. Lin and K.-H. Chen, *Nanoscale*, 2013.
2. W. S. Hummers and R. E. Offeman, *J. Amer. Chem. Soc.*, 1958, **80**, 1339-1339.
